# Supplementary material
Source: publisher figshare collection journal article supplement (https://acs.figshare.com/ndownloader/files/5335393)
Supplement: Supplementary file 1 [file 5335393]

 
data_compound3
 
_audit_creation_method            SHELXL-97
_publ_contact_author_name  'Professor Catalina Ruiz-P\'erez'
_publ_contact_author_address
;
 Laboratorio de Rayos X y Materiales Moleculares
 Dpto. F\'isica Fundamental II. Facultad de F\'isica
 Universidad de La Laguna
 E-38204. La Laguna. Tenerife
 Spain
;
_publ_contact_author_email   caruiz@ull.es
_chemical_name_systematic
;
 ?
;
_chemical_name_common             ?
_chemical_melting_point           ?
_chemical_formula_moiety          ?
_chemical_formula_sum
 'C6 H13 Eu O10'
_chemical_formula_weight          397.12
 
loop_
 _atom_type_symbol
 _atom_type_description
 _atom_type_scat_dispersion_real
 _atom_type_scat_dispersion_imag
 _atom_type_scat_source
 'C'  'C'   0.0033   0.0016
 'International Tables Vol C Tables 4.2.6.8 and 6.1.1.4'
 'H'  'H'   0.0000   0.0000
 'International Tables Vol C Tables 4.2.6.8 and 6.1.1.4'
 'Eu'  'Eu'  -0.1578   3.6682
 'International Tables Vol C Tables 4.2.6.8 and 6.1.1.4'
 'O'  'O'   0.0106   0.0060
 'International Tables Vol C Tables 4.2.6.8 and 6.1.1.4'
 
_symmetry_cell_setting            monoclinic
_symmetry_space_group_name_H-M          'P21/c'
_symmetry_space_group_name_Hall         '-P 2ybc'
_symmetry_Int_Tables_number             14
 
loop_
 _symmetry_equiv_pos_as_xyz
 'x, y, z'
 '-x, y+1/2, -z+1/2'
 '-x, -y, -z'
 'x, -y-1/2, z-1/2'
 
_cell_length_a                    6.8138(6)
_cell_length_b                    21.219(2)
_cell_length_c                    8.5434(10)
_cell_angle_alpha                 90.00
_cell_angle_beta                  105.176(7)
_cell_angle_gamma                 90.00
_cell_volume                      1192.1(2)
_cell_formula_units_Z             4
_cell_measurement_temperature     293(2)
_cell_measurement_reflns_used     ?
_cell_measurement_theta_min       ?
_cell_measurement_theta_max       ?
 
_exptl_crystal_description        prism
_exptl_crystal_colour             colourless
_exptl_crystal_size_max           0.02
_exptl_crystal_size_mid           0.02
_exptl_crystal_size_min           0.02
_exptl_crystal_density_meas       ?
_exptl_crystal_density_diffrn     2.213
_exptl_crystal_density_method     'not measured'
_exptl_crystal_F_000              768
_exptl_absorpt_coefficient_mu     5.302
_exptl_absorpt_correction_type    'none'
_exptl_absorpt_correction_T_min   ?
_exptl_absorpt_correction_T_max   ?
_exptl_absorpt_process_details    ?
 
_exptl_special_details
;
 ?
;
 
_diffrn_ambient_temperature       293(2)
_diffrn_radiation_wavelength      0.71073
_diffrn_radiation_type            MoK\a
_diffrn_radiation_source          'fine-focus sealed tube'
_diffrn_radiation_monochromator   'horizonally mounted graphite crystal'
_diffrn_radiation_probe            x-ray
_diffrn_source                    'Enraf Nonius FR590'
_diffrn_detector                  'CCD plate'
_diffrn_detector_area_resol_mean   9
_diffrn_measurement_device        '95mm CCD camera on \k-goniostat'
_diffrn_measurement_device_type    KappaCCD
_diffrn_measurement_method        'CCD rotation images, thick slices'
_diffrn_standards_number          ?
_diffrn_standards_interval_count  ?
_diffrn_standards_interval_time   ?
_diffrn_standards_decay_%         ?
_diffrn_reflns_number             6651
_diffrn_reflns_av_R_equivalents   0.0511
_diffrn_reflns_av_sigmaI/netI     0.0817
_diffrn_reflns_limit_h_min        -7
_diffrn_reflns_limit_h_max        8
_diffrn_reflns_limit_k_min        -24
_diffrn_reflns_limit_k_max        27
_diffrn_reflns_limit_l_min        -11
_diffrn_reflns_limit_l_max        6
_diffrn_reflns_theta_min          6.49
_diffrn_reflns_theta_max          27.50
_reflns_number_total              2642
_reflns_number_gt                 1871
_reflns_threshold_expression      >2sigma(I)
 
 
_refine_special_details
;
 Refinement of F^2^ against ALL reflections.  The weighted R-factor wR and
 goodness of fit S are based on F^2^, conventional R-factors R are based
 on F, with F set to zero for negative F^2^. The threshold expression of
 F^2^ > 2sigma(F^2^) is used only for calculating R-factors(gt) etc. and is
 not relevant to the choice of reflections for refinement.  R-factors based
 on F^2^ are statistically about twice as large as those based on F, and R-
 factors based on ALL data will be even larger.
;
 
_refine_ls_structure_factor_coef  Fsqd
_refine_ls_matrix_type            full
_refine_ls_weighting_scheme       calc
_refine_ls_weighting_details
 'calc w=1/[\s^2^(Fo^2^)+(0.0257P)^2^+8.9477P] where P=(Fo^2^+2Fc^2^)/3'
_atom_sites_solution_primary      direct
_atom_sites_solution_secondary    difmap
_atom_sites_solution_hydrogens    geom
_refine_ls_hydrogen_treatment     constr
_refine_ls_extinction_method      none
_refine_ls_extinction_coef        ?
_refine_ls_number_reflns          2642
_refine_ls_number_parameters      154
_refine_ls_number_restraints      0
_refine_ls_R_factor_all           0.0907
_refine_ls_R_factor_gt            0.0502
_refine_ls_wR_factor_ref          0.0983
_refine_ls_wR_factor_gt           0.0876
_refine_ls_goodness_of_fit_ref    1.104
_refine_ls_restrained_S_all       1.104
_refine_ls_shift/su_max           0.001
_refine_ls_shift/su_mean          0.000
 
loop_
 _atom_site_label
 _atom_site_type_symbol
 _atom_site_fract_x
 _atom_site_fract_y
 _atom_site_fract_z
 _atom_site_U_iso_or_equiv
 _atom_site_adp_type
 _atom_site_occupancy
 _atom_site_symmetry_multiplicity
 _atom_site_calc_flag
 _atom_site_refinement_flags
 _atom_site_disorder_assembly
 _atom_site_disorder_group
Eu1 Eu 0.12548(6) 0.648911(19) 0.47998(5) 0.01416(13) Uani 1 1 d . . .
C1 C 0.4836(11) 0.6487(5) 0.7439(9) 0.0160(16) Uani 1 1 d . . .
C2 C 0.6753(12) 0.6483(5) 0.8821(9) 0.0188(17) Uani 1 1 d . . .
H2 H 0.7400 0.6897 0.8849 0.023 Uiso 1 1 calc R . .
C3 C 0.7920(12) 0.6499(5) 1.1915(10) 0.0196(17) Uani 1 1 d . . .
C4 C 0.6184(14) 0.6397(5) 1.0408(10) 0.027(2) Uani 1 1 d . . .
H4A H 0.5658 0.5974 1.0440 0.033 Uiso 1 1 calc R . .
H4B H 0.5099 0.6690 1.0435 0.033 Uiso 1 1 calc R . .
C5 C 0.9157(13) 0.6130(4) 0.7163(11) 0.021(2) Uani 1 1 d . . .
C6 C 0.8296(13) 0.5978(4) 0.8572(11) 0.0192(18) Uani 1 1 d . . .
H6A H 0.9400 0.5947 0.9551 0.023 Uiso 1 1 calc R . .
H6B H 0.7624 0.5571 0.8387 0.023 Uiso 1 1 calc R . .
O1 O 0.4373(10) 0.6022(3) 0.6487(8) 0.0294(16) Uani 1 1 d . . .
O2 O 0.3675(10) 0.6956(3) 0.7261(8) 0.0283(16) Uani 1 1 d . . .
O3 O 0.9596(10) 0.6729(3) 1.1857(7) 0.0250(14) Uani 1 1 d . . .
O4 O 0.7649(9) 0.6333(3) 1.3269(7) 0.0267(15) Uani 1 1 d . . .
O5 O 0.9829(10) 0.5701(3) 0.6442(8) 0.0287(15) Uani 1 1 d . . .
O6 O 0.9349(10) 0.6703(3) 0.6797(8) 0.0292(16) Uani 1 1 d . . .
O1W O 0.0837(10) 0.7601(3) 0.4584(7) 0.0278(15) Uani 1 1 d . . .
O2W O 0.1549(10) 0.5517(3) 0.3441(8) 0.0307(16) Uani 1 1 d . . .
O3W O 0.3957(10) 0.6852(3) 0.3635(8) 0.0300(16) Uani 1 1 d . . .
O4W O 0.4835(12) 0.4742(3) 0.7088(10) 0.048(2) Uani 1 1 d . . .
 
loop_
 _atom_site_aniso_label
 _atom_site_aniso_U_11
 _atom_site_aniso_U_22
 _atom_site_aniso_U_33
 _atom_site_aniso_U_23
 _atom_site_aniso_U_13
 _atom_site_aniso_U_12
Eu1 0.0133(2) 0.0185(2) 0.00951(19) -0.0003(2) 0.00082(13) 0.0006(2)
C1 0.013(4) 0.024(4) 0.012(4) 0.004(4) 0.004(3) -0.001(4)
C2 0.015(4) 0.028(4) 0.012(4) -0.003(4) 0.003(3) 0.001(4)
C3 0.015(4) 0.029(5) 0.012(4) 0.002(4) -0.001(3) 0.004(4)
C4 0.020(4) 0.048(6) 0.013(4) 0.000(4) 0.003(3) -0.002(5)
C5 0.015(4) 0.028(5) 0.017(5) 0.002(4) 0.003(4) 0.000(4)
C6 0.016(4) 0.025(5) 0.018(4) -0.001(4) 0.006(4) -0.002(4)
O1 0.029(4) 0.021(3) 0.028(4) -0.004(3) -0.010(3) 0.003(3)
O2 0.026(4) 0.032(4) 0.019(4) -0.010(3) -0.008(3) 0.007(3)
O3 0.024(3) 0.036(4) 0.013(3) 0.000(3) 0.002(3) -0.006(3)
O4 0.021(3) 0.047(4) 0.010(3) 0.005(3) 0.001(3) -0.002(3)
O5 0.041(4) 0.027(4) 0.024(4) 0.001(3) 0.018(3) 0.003(3)
O6 0.037(4) 0.030(4) 0.024(4) -0.003(3) 0.015(3) -0.008(3)
O1W 0.038(4) 0.030(3) 0.015(3) 0.002(3) 0.007(3) 0.013(3)
O2W 0.033(4) 0.027(4) 0.033(4) -0.011(3) 0.010(3) -0.006(3)
O3W 0.023(4) 0.036(4) 0.037(4) 0.012(3) 0.018(3) 0.005(3)
O4W 0.042(5) 0.033(4) 0.073(6) 0.002(4) 0.022(4) -0.004(3)
 
_geom_special_details
;
 All esds (except the esd in the dihedral angle between two l.s. planes)
 are estimated using the full covariance matrix.  The cell esds are taken
 into account individually in the estimation of esds in distances, angles
 and torsion angles; correlations between esds in cell parameters are only
 used when they are defined by crystal symmetry.  An approximate (isotropic)
 treatment of cell esds is used for estimating esds involving l.s. planes.
;
 
loop_
 _geom_bond_atom_site_label_1
 _geom_bond_atom_site_label_2
 _geom_bond_distance
 _geom_bond_site_symmetry_2
 _geom_bond_publ_flag
Eu1 O1W 2.378(6) . ?
Eu1 O2W 2.400(6) . ?
Eu1 O3W 2.436(6) . ?
Eu1 O6 2.442(6) 1_455 ?
Eu1 O1 2.443(6) . ?
Eu1 O4 2.485(6) 1_454 ?
Eu1 O2 2.511(6) . ?
Eu1 O3 2.524(6) 1_454 ?
Eu1 O5 2.534(6) 1_455 ?
Eu1 C1 2.856(8) . ?
Eu1 C5 2.865(9) 1_455 ?
Eu1 C3 2.882(8) 1_454 ?
C1 O2 1.255(10) . ?
C1 O1 1.264(11) . ?
C1 C2 1.514(11) . ?
C2 C4 1.515(12) . ?
C2 C6 1.555(12) . ?
C3 O3 1.255(10) . ?
C3 O4 1.268(10) . ?
C3 C4 1.518(12) . ?
C3 Eu1 2.882(8) 1_656 ?
C5 O5 1.252(11) . ?
C5 O6 1.271(11) . ?
C5 C6 1.506(12) . ?
C5 Eu1 2.865(9) 1_655 ?
O3 Eu1 2.524(6) 1_656 ?
O4 Eu1 2.485(6) 1_656 ?
O5 Eu1 2.534(6) 1_655 ?
O6 Eu1 2.442(6) 1_655 ?
 
loop_
 _geom_angle_atom_site_label_1
 _geom_angle_atom_site_label_2
 _geom_angle_atom_site_label_3
 _geom_angle
 _geom_angle_site_symmetry_1
 _geom_angle_site_symmetry_3
 _geom_angle_publ_flag
O1W Eu1 O2W 147.0(2) . . ?
O1W Eu1 O3W 75.1(2) . . ?
O2W Eu1 O3W 84.6(2) . . ?
O1W Eu1 O6 78.1(2) . 1_455 ?
O2W Eu1 O6 128.7(2) . 1_455 ?
O3W Eu1 O6 145.5(2) . 1_455 ?
O1W Eu1 O1 121.1(2) . . ?
O2W Eu1 O1 76.5(2) . . ?
O3W Eu1 O1 74.7(2) . . ?
O6 Eu1 O1 101.7(2) 1_455 . ?
O1W Eu1 O4 90.6(2) . 1_454 ?
O2W Eu1 O4 80.0(2) . 1_454 ?
O3W Eu1 O4 125.2(2) . 1_454 ?
O6 Eu1 O4 76.1(2) 1_455 1_454 ?
O1 Eu1 O4 147.5(2) . 1_454 ?
O1W Eu1 O2 73.3(2) . . ?
O2W Eu1 O2 128.6(2) . . ?
O3W Eu1 O2 79.4(2) . . ?
O6 Eu1 O2 72.2(2) 1_455 . ?
O1 Eu1 O2 52.2(2) . . ?
O4 Eu1 O2 146.7(2) 1_454 . ?
O1W Eu1 O3 73.1(2) . 1_454 ?
O2W Eu1 O3 76.3(2) . 1_454 ?
O3W Eu1 O3 73.7(2) . 1_454 ?
O6 Eu1 O3 118.5(2) 1_455 1_454 ?
O1 Eu1 O3 139.7(2) . 1_454 ?
O4 Eu1 O3 51.6(2) 1_454 1_454 ?
O2 Eu1 O3 141.2(2) . 1_454 ?
O1W Eu1 O5 130.0(2) . 1_455 ?
O2W Eu1 O5 78.1(2) . 1_455 ?
O3W Eu1 O5 151.0(2) . 1_455 ?
O6 Eu1 O5 52.1(2) 1_455 1_455 ?
O1 Eu1 O5 78.8(2) . 1_455 ?
O4 Eu1 O5 74.6(2) 1_454 1_455 ?
O2 Eu1 O5 93.4(2) . 1_455 ?
O3 Eu1 O5 123.2(2) 1_454 1_455 ?
O1W Eu1 C1 97.1(2) . . ?
O2W Eu1 C1 102.6(2) . . ?
O3W Eu1 C1 75.0(2) . . ?
O6 Eu1 C1 87.1(2) 1_455 . ?
O1 Eu1 C1 26.1(2) . . ?
O4 Eu1 C1 159.7(2) 1_454 . ?
O2 Eu1 C1 26.0(2) . . ?
O3 Eu1 C1 148.6(2) 1_454 . ?
O5 Eu1 C1 86.2(2) 1_455 . ?
O1W Eu1 C5 104.3(2) . 1_455 ?
O2W Eu1 C5 103.5(2) . 1_455 ?
O3W Eu1 C5 160.4(2) . 1_455 ?
O6 Eu1 C5 26.2(2) 1_455 1_455 ?
O1 Eu1 C5 89.7(2) . 1_455 ?
O4 Eu1 C5 74.3(2) 1_454 1_455 ?
O2 Eu1 C5 81.6(2) . 1_455 ?
O3 Eu1 C5 125.4(2) 1_454 1_455 ?
O5 Eu1 C5 25.9(2) 1_455 1_455 ?
C1 Eu1 C5 85.6(2) . 1_455 ?
O1W Eu1 C3 82.8(2) . 1_454 ?
O2W Eu1 C3 74.9(2) . 1_454 ?
O3W Eu1 C3 99.2(2) . 1_454 ?
O6 Eu1 C3 98.7(2) 1_455 1_454 ?
O1 Eu1 C3 151.2(2) . 1_454 ?
O4 Eu1 C3 26.0(2) 1_454 1_454 ?
O2 Eu1 C3 155.7(2) . 1_454 ?
O3 Eu1 C3 25.8(2) 1_454 1_454 ?
O5 Eu1 C3 98.5(2) 1_455 1_454 ?
C1 Eu1 C3 174.0(2) . 1_454 ?
C5 Eu1 C3 100.2(2) 1_455 1_454 ?
O2 C1 O1 119.8(7) . . ?
O2 C1 C2 119.1(8) . . ?
O1 C1 C2 121.1(8) . . ?
O2 C1 Eu1 61.5(4) . . ?
O1 C1 Eu1 58.4(4) . . ?
C2 C1 Eu1 179.2(6) . . ?
C1 C2 C4 109.2(7) . . ?
C1 C2 C6 111.9(7) . . ?
C4 C2 C6 112.4(7) . . ?
O3 C3 O4 119.7(7) . . ?
O3 C3 C4 122.5(8) . . ?
O4 C3 C4 117.8(8) . . ?
O3 C3 Eu1 60.9(4) . 1_656 ?
O4 C3 Eu1 59.2(4) . 1_656 ?
C4 C3 Eu1 171.5(7) . 1_656 ?
C2 C4 C3 114.6(7) . . ?
O5 C5 O6 120.1(8) . . ?
O5 C5 C6 120.4(8) . . ?
O6 C5 C6 119.3(8) . . ?
O5 C5 Eu1 62.1(5) . 1_655 ?
O6 C5 Eu1 58.0(4) . 1_655 ?
C6 C5 Eu1 172.3(6) . 1_655 ?
C5 C6 C2 112.3(7) . . ?
C1 O1 Eu1 95.5(5) . . ?
C1 O2 Eu1 92.5(5) . . ?
C3 O3 Eu1 93.3(5) . 1_656 ?
C3 O4 Eu1 94.8(5) . 1_656 ?
C5 O5 Eu1 92.0(5) . 1_655 ?
C5 O6 Eu1 95.8(5) . 1_655 ?
 
_diffrn_measured_fraction_theta_max    0.968
_diffrn_reflns_theta_full              27.50
_diffrn_measured_fraction_theta_full   0.968
_refine_diff_density_max    0.960
_refine_diff_density_min   -0.725
_refine_diff_density_rms    0.229
